# Supplementary material for: BPA, BPAF and TMBPF Alter Adipogenesis and Fat Accumulation in Human Mesenchymal Stem Cells, with Implications for Obesity
Source: Int J Mol Sci. 2021 May 19;22(10):5363. doi: 10.3390/ijms22105363 (PMC8160667; doi:10.3390/ijms22105363)
Supplement: Supplementary file 1 [file ijms-22-05363-s001.zip › ijms-1188072-supplementary.pdf]

# ***BPA, BPAF, and TMBPF alter adipogenesis and fat accumulation in human mesenchymal stem cells, with implications for obesity***

Isabel C. Cohen, Emry R. Cohenour, Kristen G. Harnett, and Sonya M. Schuh

## **Supplemental Figures**

**Figure S1**

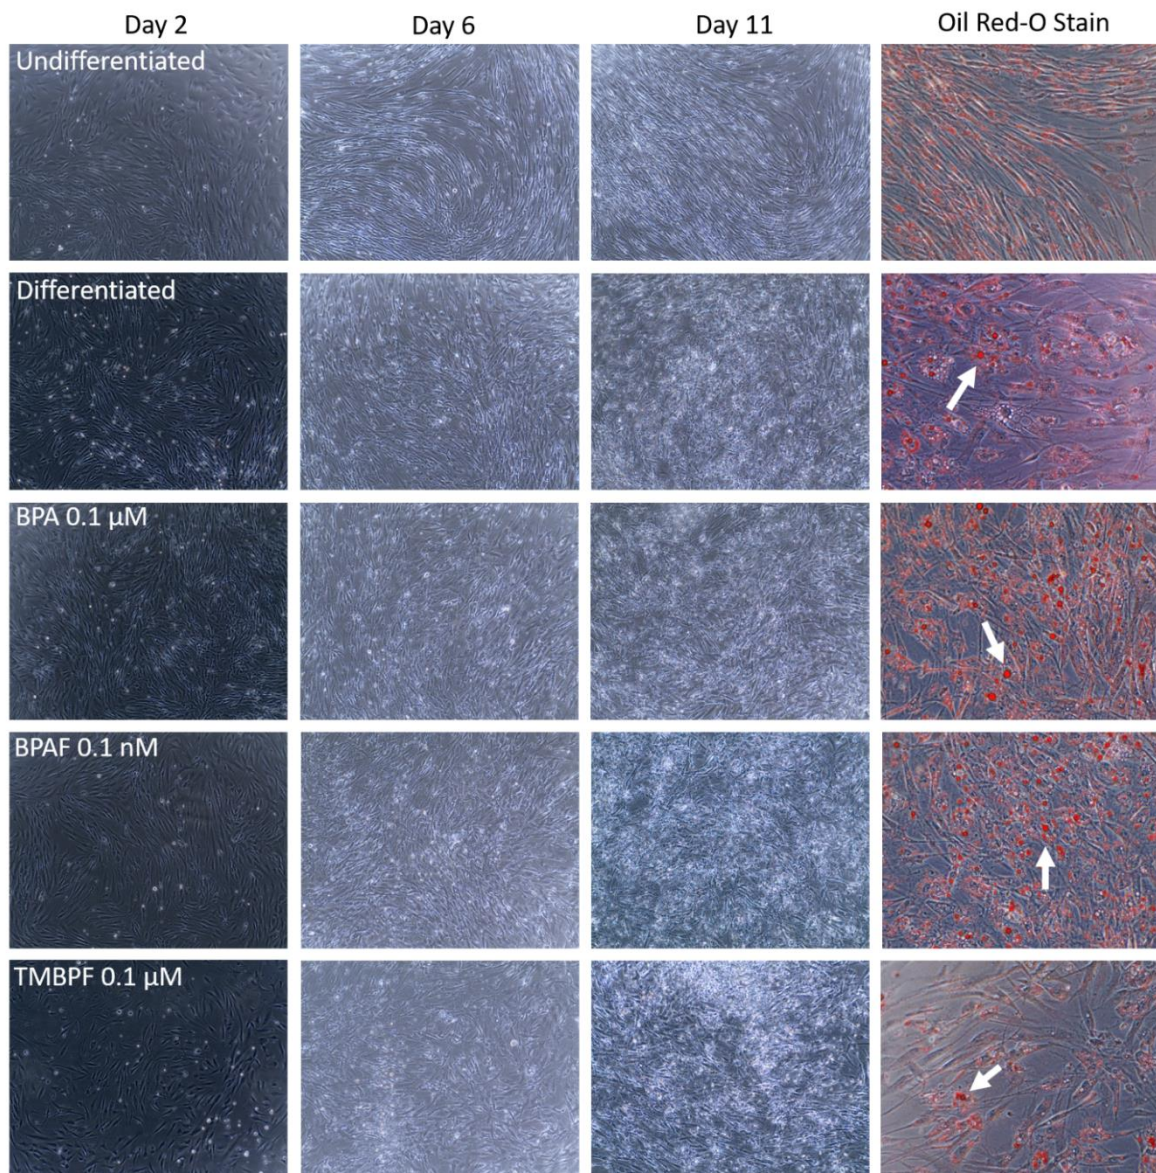

**Figure S1. BPA and BPAF increase adipogenesis during the differentiation process.** Brightfield images of undifferentiated cells, control differentiated cells, and cells treated with either 0.1 μM BPA, 0.1 nM BPAF, or 0.1 μM TMBPF on Day 2, 6 and 11 during the adipocyte differentiation process. Notice the greater numbers of adipocytes in BPA- and BPAF-treated cells, and the fewer numbers of adipocytes and lipid vacuoles in the TMBPF-treated cells. Arrows indicate lipid vacuoles. 1

**Figure S2**

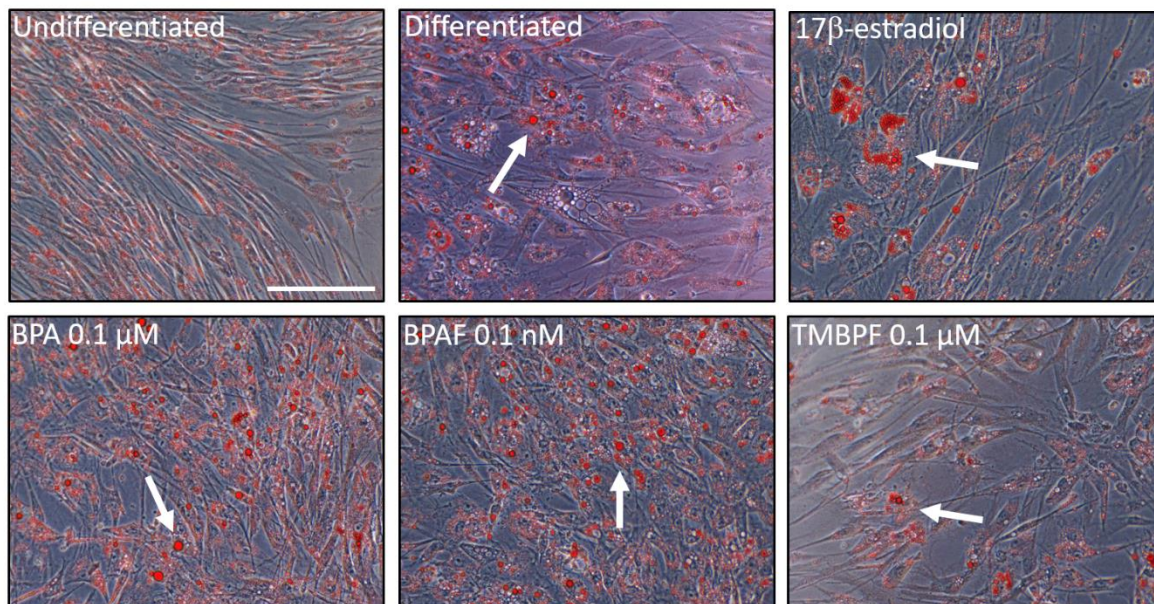

**Figure S2. BPA and BPAF increase adipogenesis.** Brightfield images of undifferentiated cells, control differentiated cells, or cells treated with either 10  $\mu$ M 17 $\beta$ -estradiol, 0.1  $\mu$ M BPA, 0.1 nM BPAF, or 0.1  $\mu$ M TMBPF during the adipocyte differentiation process. Notice the relatively higher level of adipogenesis and lipid production in the BPA- and BPAF-differentiated cells (see red spheres; white arrows indicate large lipid vacuoles) (200X magnification; scale bar = 150  $\mu$ m).

**Figure S3**

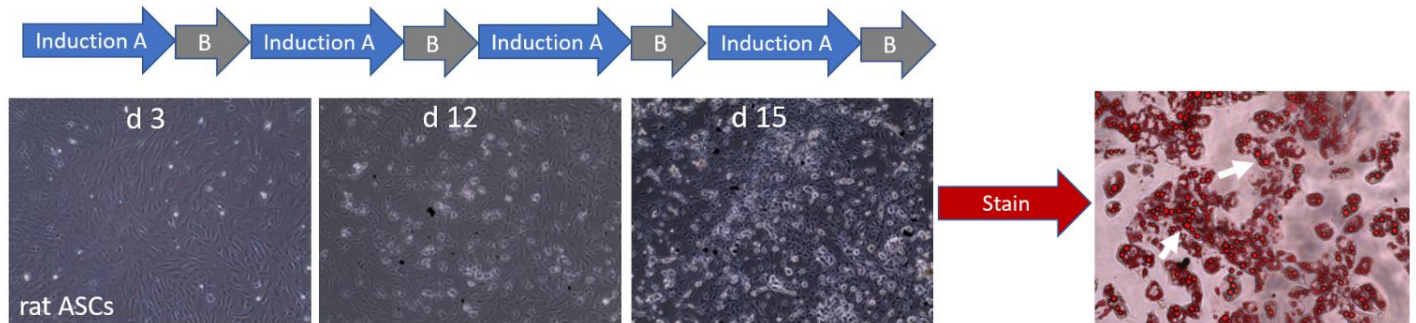

**Figure S3. The differentiation process of rat adipose-derived stem cells into adipocytes.**

Brightfield images of cells treated with induction medium A for 3 days, then maintenance medium B for 24 hours, for 4 cycles. All cells were fixed, stained with Oil Red-O, imaged, and quantified for lipid vacuoles (white arrows).
